# Supplementary material for: Excited state properties of an A–D–A non-fullerene electron acceptor: a LC-TD-DFTB study
Source: Royal Society of Chemistry journal article supplement (doi:10.1039/d3cp06166c), 2024-01-01
Supplement: d3cp06166c1.pdf [file d3cp06166c1.pdf]

## SUPPORTING INFORMATION

### **Excited state properties of A-D-A non-fullerene electron acceptor: A LC-TD-DFTB study**

Rafael Bicudo Ribeiro\*, Márcio Teixeira do Nascimento Varella

*Institute of Physics*

*University of São Paulo*

*Rua do Matão 1371, 05508-090, São Paulo, São Paulo, Brazil*

# Contents

|          |                                                                                                                                                                                                                                                                                                                                                                                                            |          |
|----------|------------------------------------------------------------------------------------------------------------------------------------------------------------------------------------------------------------------------------------------------------------------------------------------------------------------------------------------------------------------------------------------------------------|----------|
| <b>1</b> | <b>Long-range parameter optimization . . . . .</b>                                                                                                                                                                                                                                                                                                                                                         | <b>6</b> |
| S1       | Interpolation of $\omega$ B97X-D/6-31G(d,p) optimization criteria $J_1$ and $J_2$ as a function of long-range parameter for naphthalene, anthracene and pyrene molecules. $J_i$ were determined using vertical IP and EA, whilst for $J_i^{\text{exp}}$ experimental values were employed. . . . .                                                                                                         | 6        |
| S2       | Interpolation of CAM-B3LYP/6-31G(d,p) optimization criteria $J_1$ and $J_2$ as a function of long-range parameter for naphthalene, anthracene and pyrene molecules. $J_i$ were determined using vertical IP and EA, whilst for $J_i^{\text{exp}}$ experimental values were employed. . . . .                                                                                                               | 7        |
| S3       | Interpolation of LC-TD-DFTB/n-OB2 optimization criteria $J_1$ and $J_2$ as a function of long-range parameter for naphthalene, anthracene and pyrene molecules. $J_i$ were determined using vertical IP and EA, whilst for $J_i^{\text{exp}}$ experimental values were adopted. . . . .                                                                                                                    | 8        |
| S1       | Ionization potential (IP), electron affinity (EA), HOMO ( $\epsilon_{\text{HOMO}}$ ) and LUMO ( $\epsilon_{\text{LUMO}}$ ) energies for each PAH. The DFTB results are presented for both optimized $\omega$ and 6-31G(d,p) basis set was employed along with $\omega$ B97X-D potential. Experimental values are also shown. . . . .                                                                       | 9        |
| S4       | Ionization potential (IP) and HOMO energies as a function of long-range parameter ( $\omega$ ) for naphthalene, anthracene and pyrene at $\omega$ B97X-D/6-31G(d,p), CAM-B3LYP/6-31G(d,p) and LC-TD-DFTB/n-OB2 levels of theory. The dashed line correspond to the reference MP3/6-31+G(d,p) HOMO energies extracted from NIST Computational Chemistry Comparison and Benchmark Database (CCCBDB). . . . . | 10       |

|          |                                                                                                                                                                                                                                                                                                                                                                                                                                 |           |
|----------|---------------------------------------------------------------------------------------------------------------------------------------------------------------------------------------------------------------------------------------------------------------------------------------------------------------------------------------------------------------------------------------------------------------------------------|-----------|
| S2       | Ionization potential (IP), electron affinity (EA), HOMO ( $\epsilon_{HOMO}$ ) and LUMO ( $\epsilon_{LUMO}$ ) orbital energies for full and alkane-free DTP-IC-4Ph. The DFTB results are presented for both optimized $\omega$ and 6-31G(d,p) basis set was employed along with $\omega$ B97X-D potential. The symbol † represents absence of alkane groups. . . . .                                                             | 11        |
| S5       | Interpolation of DTP-IC-4Ph vertical optimization criteria $J_1$ and $J_2$ , $IP$ , $EA$ , $\epsilon_{HOMO}$ and $\epsilon_{LUMO}$ as a function of long-range parameter. The results were determined at the $\omega$ B97X-D/6-31G(d,p) level of theory and each row employs the geometry optimized using a different $\omega$ , ranging from 0.1 to $0.5 a_0^{-1}$ . . . . .                                                   | 12        |
| S6       | Kernel of short and long-range exchange contributions using (a) error functions and (b) Yukawa decompositions for $\omega = 0.1$ and $0.5 a_0^{-1}$ . (c) Comparison between both decompositions with $\omega = 0.5 a_0^{-1}$ . (d) Attenuation functions for BNL and $\omega$ B97X-D SR-DFT exchange contributions as a function of the ratio between $\omega$ and the local Fermi wavevector ( $a_{\sigma,\omega}$ ). . . . . | 13        |
| <b>2</b> | <b>Excited states . . . . .</b>                                                                                                                                                                                                                                                                                                                                                                                                 | <b>14</b> |
| 2.1      | PAHs . . . . .                                                                                                                                                                                                                                                                                                                                                                                                                  | 14        |
| S7       | Excitation energies ( $E$ ) and oscillator strengths ( $f$ ) for the first ( $S_1$ ) and brightest ( $S_B$ ) excited states of naphthalene at LC-TD-DFTB/n-OB2, $\omega$ B97X-D/6-31G(d,p) and ADC2/6-31G(d,p) levels of theory. A visual representation of each excitation is also shown in terms of Natural Transition Orbitals (NTOs) and dominant molecular orbitals (MO). . . . .                                          | 14        |
| S3       | Excitation energies ( $E$ ) and oscillator strengths ( $f$ ) of the first and brightest excited state of naphthalene, anthracene and pyrene, obtained via LC-TD-DFTB/n-OB2, $\omega$ B97X-D/6-31G(d,p) and ADC2/6-31G(d,p) levels of theory. . . . .                                                                                                                                                                            | 15        |

|     |                                                                                                                                                                                                                                                                                                                                                                                                                                                                           |    |
|-----|---------------------------------------------------------------------------------------------------------------------------------------------------------------------------------------------------------------------------------------------------------------------------------------------------------------------------------------------------------------------------------------------------------------------------------------------------------------------------|----|
| S8  | Excitation energies ( $E$ ) and oscillator strengths ( $f$ ) for the first ( $S_1$ ) and brightest ( $S_B$ ) excited states of anthracene at LC-TD-DFTB/n-OB2, $\omega$ B97X-D/6-31G(d,p) and ADC2/6-31G(d,p) levels of theory. A visual representation of each excitation is also shown in terms of Natural Transition Orbitals (NTOs) and dominant molecular orbitals (MO). . . . .                                                                                     | 16 |
| S9  | Naphthalene absorption spectra using using $\omega$ B97X-D functional with Pople and correlated-consistent basis sets. . . . .                                                                                                                                                                                                                                                                                                                                            | 16 |
| 2.2 | DTP-IC-4Ph . . . . .                                                                                                                                                                                                                                                                                                                                                                                                                                                      | 17 |
| S10 | Normalized absorption spectra of DTP-IC-4Ph with and without alkyl chains for $\omega = 0.2 a_0^{-1}$ (top) and $\omega = 0.3 a_0^{-1}$ (bottom). Oscillator strengths are also plotted as vertical lines. . . . .                                                                                                                                                                                                                                                        | 17 |
| S4  | Exciton position (POS), charge-transfer number (CT), NTO participation ratio ( $PR_{NTO}$ ) and exciton size ( $\tilde{d}_{exc}$ ) of $S_1$ , $S_5$ , $S_9$ , $S_{12}$ and $S_{35}$ excited states of DTP-IC-4Ph at $\omega$ B97X-D level of theory. The symbol † represents absence of alkane groups. . . . .                                                                                                                                                            | 18 |
| S5  | Exciton position (POS), charge-transfer number (CT), NTO participation ratio ( $PR_{NTO}$ ) and exciton size ( $\tilde{d}_{exc}$ ) of $S_1$ , $S_5$ , $S_9$ , $S_{12}$ and $S_{35}$ excited states of DTP-IC-4Ph using $\omega$ B97X-D at the LC-TD-DFTB/n-OB2 optimized geometry. The symbol † represents absence of alkane groups. . . .                                                                                                                                | 19 |
| S11 | Fragment-based analysis of DTP-IC-4Ph without alkyl chains via $\omega$ B97X-D/6-31G(d,p) at the geometry optimized using LC-TD-DFTB/n-OB2. (a) In the lower panel, excited states character are presented, with the corresponding excitation energies and oscillator strengths shown in the upper panel. (b) Electron-hole correlation plots of $S_1$ , $S_5$ , $S_9$ , $S_{12}$ and $S_{35}$ from left to right, respectively. (c) DTP-IC-4Ph divided into 7 fragments. | 20 |



|          |                                                                                                                                                                                                                                                                                                                                                                                                                                                              |           |
|----------|--------------------------------------------------------------------------------------------------------------------------------------------------------------------------------------------------------------------------------------------------------------------------------------------------------------------------------------------------------------------------------------------------------------------------------------------------------------|-----------|
| S12      | Fragment-based analysis of DTP-IC-4Ph via $\omega$ B97X-D/6-31G(d,p) at the geometry optimized using LC-TD-DFTB/n-OB2. (a) In the lower panel, excited states character are presented, with the corresponding excitation energies and oscillator strengths shown in the upper panel. (b) Electron-hole correlation plots of $S_1$ , $S_5$ , $S_9$ , $S_{12}$ and $S_{35}$ from left to right, respectively. (c) DTP-IC-4Ph divided into 7 fragments. . . . . | 21        |
| <b>3</b> | <b>Molecular volume estimate . . . . .</b>                                                                                                                                                                                                                                                                                                                                                                                                                   | <b>22</b> |
| S13      | Schematic representation of DFT-D3 van der Waals spheres of DTP-IC-4Ph <sup>†</sup> considered to estimate the molecular volume. The symbol † represents absence of alkane groups. . . . .                                                                                                                                                                                                                                                                   | 22        |
| S14      | Evolution of DTP-IC-4Ph molecular volume. In the upper panel, the volume ( $V$ ) is shown as a function of the number of points ( $N$ ) for the first 50000 points of a single trial. The histogram in the lower panel shows the first 100000 points distribution of the same trial. . . . .                                                                                                                                                                 | 23        |
| S6       | Volume of representative small molecules determined using both methods. The standard deviation comes from the average of 10 calculations using $10^6$ points in each. . . . .                                                                                                                                                                                                                                                                                | 23        |
| <b>4</b> | <b>Slater-Kirkwood dispersion constants . . . . .</b>                                                                                                                                                                                                                                                                                                                                                                                                        | <b>24</b> |
| S7       | Slater-Kirkwood dispersion coefficients employed in DFTB calculations. The cutoff radius is given for zero (0), one (1) and so on up to five or more (5+) first neighbours. . . . .                                                                                                                                                                                                                                                                          | 24        |

# 1 Long-range parameter optimization

The interpolation of  $J_1$ ,  $J_2$  and  $J_3$  criteria is presented for the three PAHs at each level of theory.

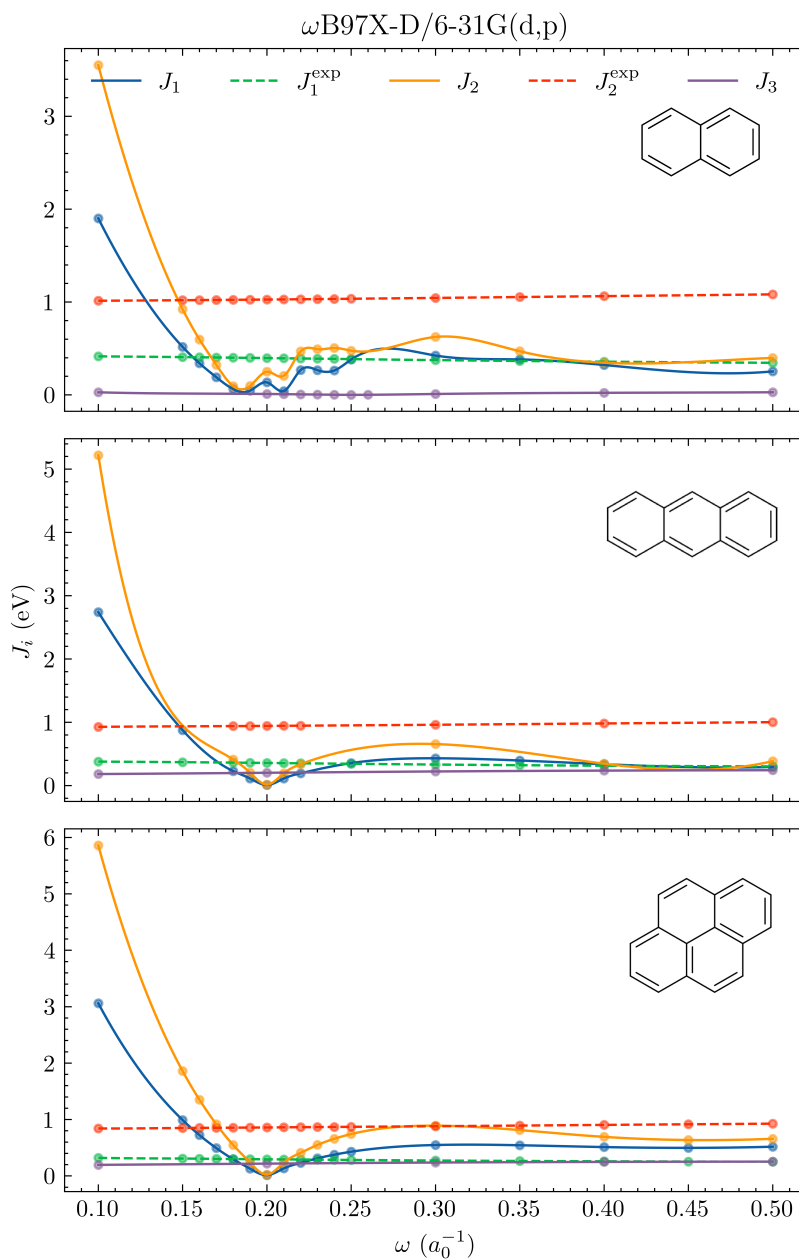

Figure S1: Interpolation of  $\omega$ B97X-D/6-31G(d,p) optimization criteria  $J_1$  and  $J_2$  as a function of long-range parameter for naphthalene, anthracene and pyrene molecules.  $J_i$  were determined using vertical IP and EA, whilst for  $J_i^{\text{exp}}$  experimental values were employed.

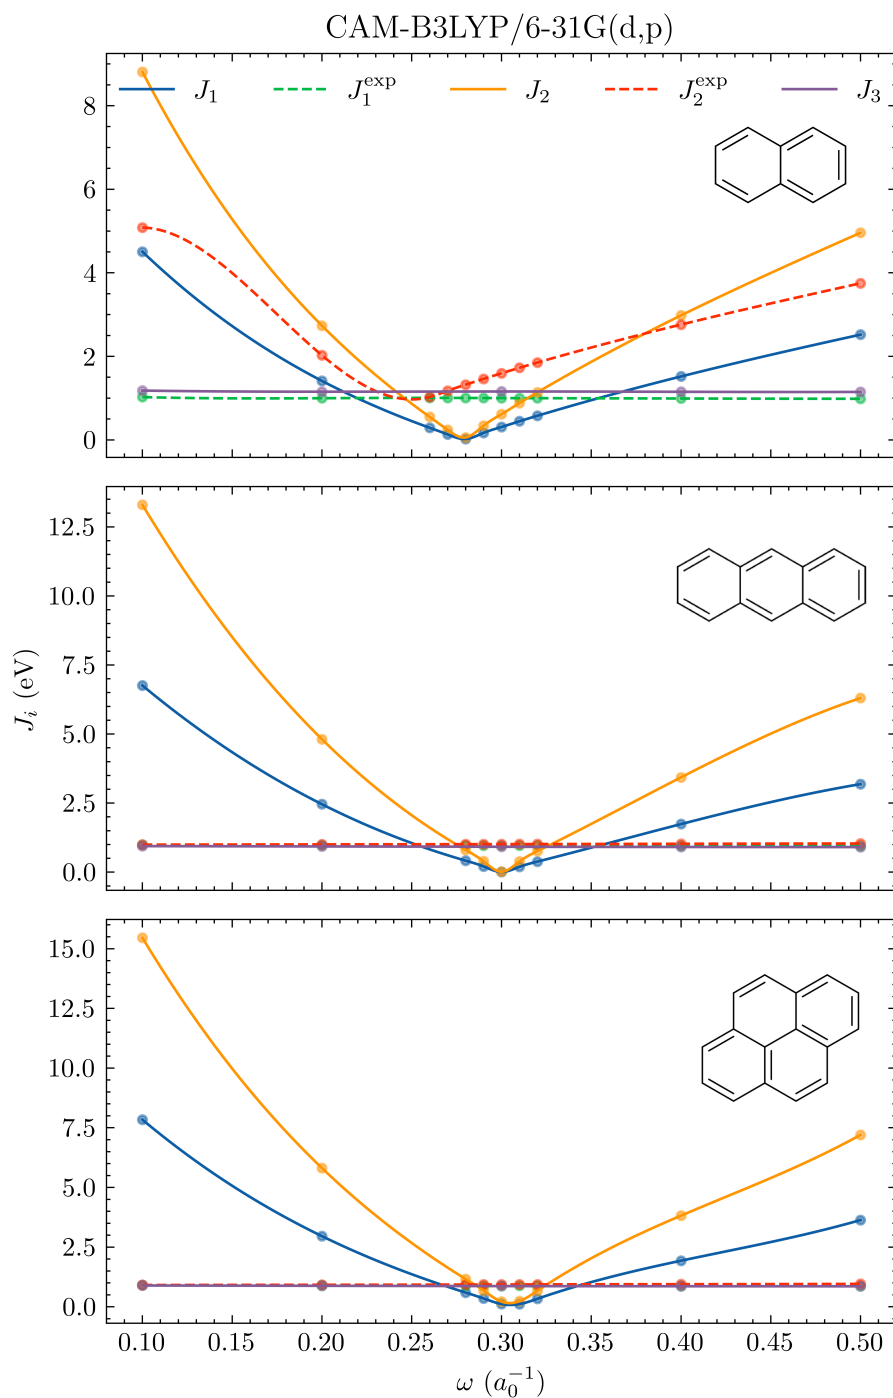

Figure S2: Interpolation of CAM-B3LYP/6-31G(d,p) optimization criteria  $J_1$  and  $J_2$  as a function of long-range parameter for naphthalene, anthracene and pyrene molecules.  $J_i$  were determined using vertical IP and EA, whilst for  $J_i^{\text{exp}}$  experimental values were employed.

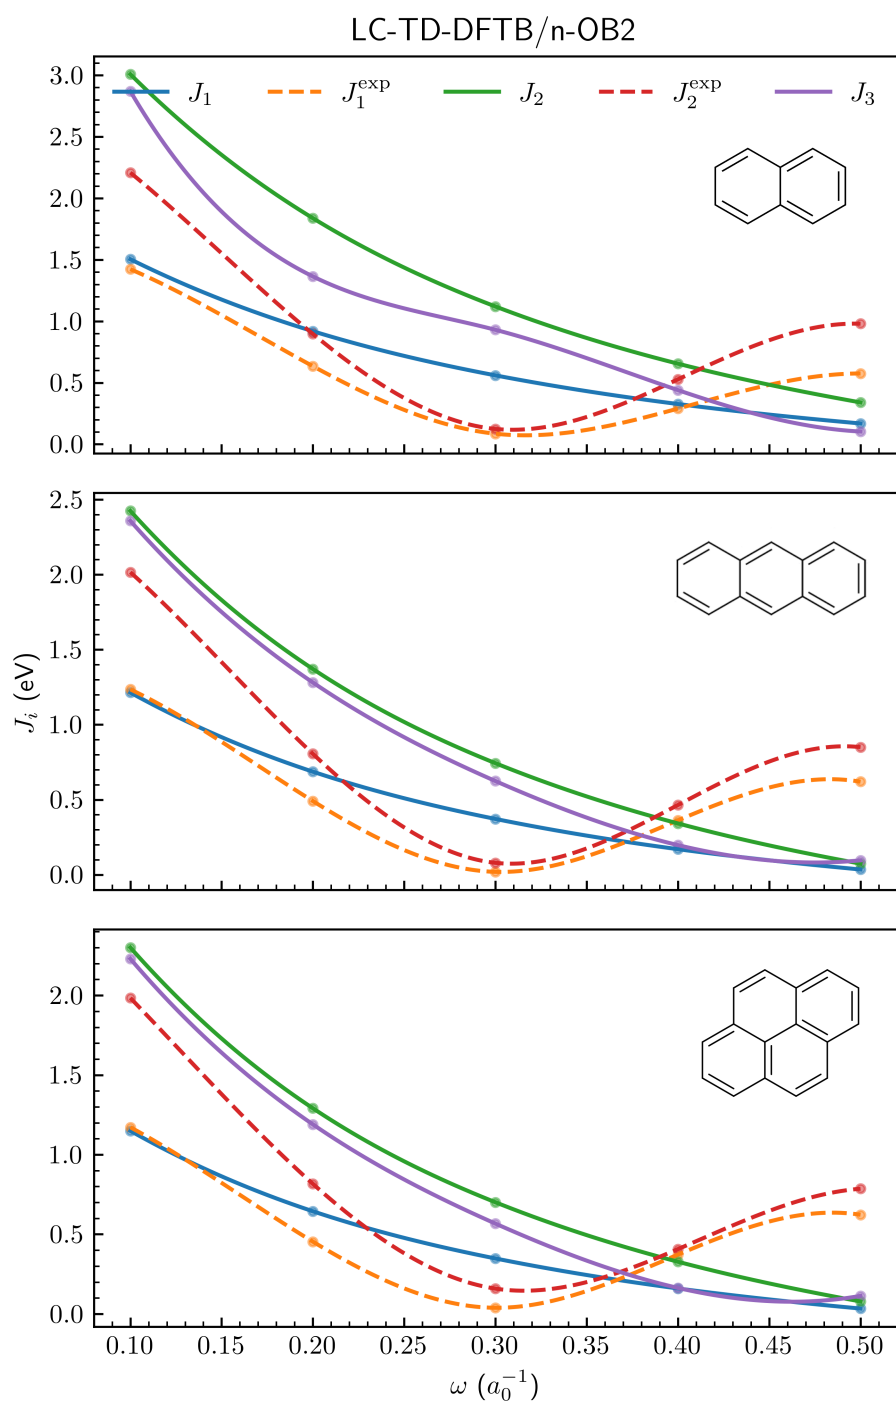

Figure S3: Interpolation of LC-TD-DFTB/n-OB2 optimization criteria  $J_1$  and  $J_2$  as a function of long-range parameter for naphthalene, anthracene and pyrene molecules.  $J_i$  were determined using vertical IP and EA, whilst for  $J_i^{\text{exp}}$  experimental values were adopted.

| System      | Method          | $\omega$ ( $a_0^{-1}$ ) | IP (eV)   | EA (eV)    | $\epsilon_{HOMO}$ (eV) | $\epsilon_{LUMO}$ (eV) |
|-------------|-----------------|-------------------------|-----------|------------|------------------------|------------------------|
| Naphthalene | $\omega$ B97X-D | 0.1                     | 5.828     | 0.852      | -7.729                 | 0.799                  |
|             |                 | 0.2                     | 7.882     | -0.945     | -7.748                 | 0.830                  |
|             |                 | 0.3                     | 8.194     | -1.069     | -7.769                 | 0.870                  |
|             |                 | 0.4                     | 8.108     | -0.882     | -7.787                 | 0.906                  |
|             |                 | 0.5                     | 8.052     | -0.793     | -7.799                 | 0.937                  |
|             | LC-DFTB         | 0.1                     | 8.225     | -0.919     | -6.721                 | -0.585                 |
|             |                 | 0.2                     | 8.429     | -0.856     | -7.510                 | -0.062                 |
|             |                 | 0.3                     | 8.618     | -0.799     | -8.059                 | 0.239                  |
|             |                 | 0.4                     | 8.761     | -0.766     | -8.434                 | 0.438                  |
|             |                 | 0.5                     | 8.889     | -0.775     | -8.720                 | 0.604                  |
|             | Exp.            | -                       | 8.144 [1] | -0.200 [2] | -                      | -                      |
| Anthracene  | $\omega$ B97X-D | 0.1                     | 4.318     | 2.459      | -7.059                 | 0.019                  |
|             |                 | 0.2                     | 7.091     | -0.061     | -7.081                 | 0.055                  |
|             |                 | 0.3                     | 7.538     | -0.323     | -7.106                 | 0.099                  |
|             |                 | 0.4                     | 7.463     | -0.146     | -7.124                 | 0.138                  |
|             |                 | 0.5                     | 7.430     | -0.077     | -7.135                 | 0.169                  |
|             | LC-DFTB         | 0.1                     | 7.418     | 0.100      | -6.204                 | -1.311                 |
|             |                 | 0.2                     | 7.635     | 0.160      | -6.948                 | -0.844                 |
|             |                 | 0.3                     | 7.830     | 0.219      | -7.458                 | -0.590                 |
|             |                 | 0.4                     | 7.972     | 0.256      | -7.802                 | -0.428                 |
|             |                 | 0.5                     | 8.094     | 0.261      | -8.059                 | -0.300                 |
|             | Exp.            | -                       | 7.439 [3] | 0.530 [4]  | -                      | -                      |
| Pyrene      | $\omega$ B97X-D | 0.1                     | 4.045     | 2.685      | -7.105                 | 0.115                  |
|             |                 | 0.2                     | 7.145     | -0.166     | -7.131                 | 0.158                  |
|             |                 | 0.3                     | 7.701     | -0.545     | -7.153                 | 0.202                  |
|             |                 | 0.4                     | 7.678     | -0.420     | -7.166                 | 0.239                  |
|             |                 | 0.5                     | 7.692     | -0.409     | -7.174                 | 0.269                  |
|             | LC-DFTB         | 0.1                     | 7.404     | 0.067      | -6.254                 | -1.219                 |
|             |                 | 0.2                     | 7.616     | 0.122      | -6.972                 | -0.769                 |
|             |                 | 0.3                     | 7.812     | 0.174      | -7.464                 | -0.526                 |
|             |                 | 0.4                     | 7.958     | 0.204      | -7.798                 | -0.014                 |
|             |                 | 0.5                     | 8.082     | 0.198      | -8.048                 | -0.243                 |
|             | Exp.            | -                       | 7.426 [3] | 0.406 [5]  | -                      | -                      |

Table S1: Ionization potential (IP), electron affinity (EA), HOMO ( $\epsilon_{HOMO}$ ) and LUMO ( $\epsilon_{LUMO}$ ) energies for each PAH. The DFTB results are presented for both optimized  $\omega$  and 6-31G(d,p) basis set was employed along with  $\omega$ B97X-D potential. Experimental values are also shown.

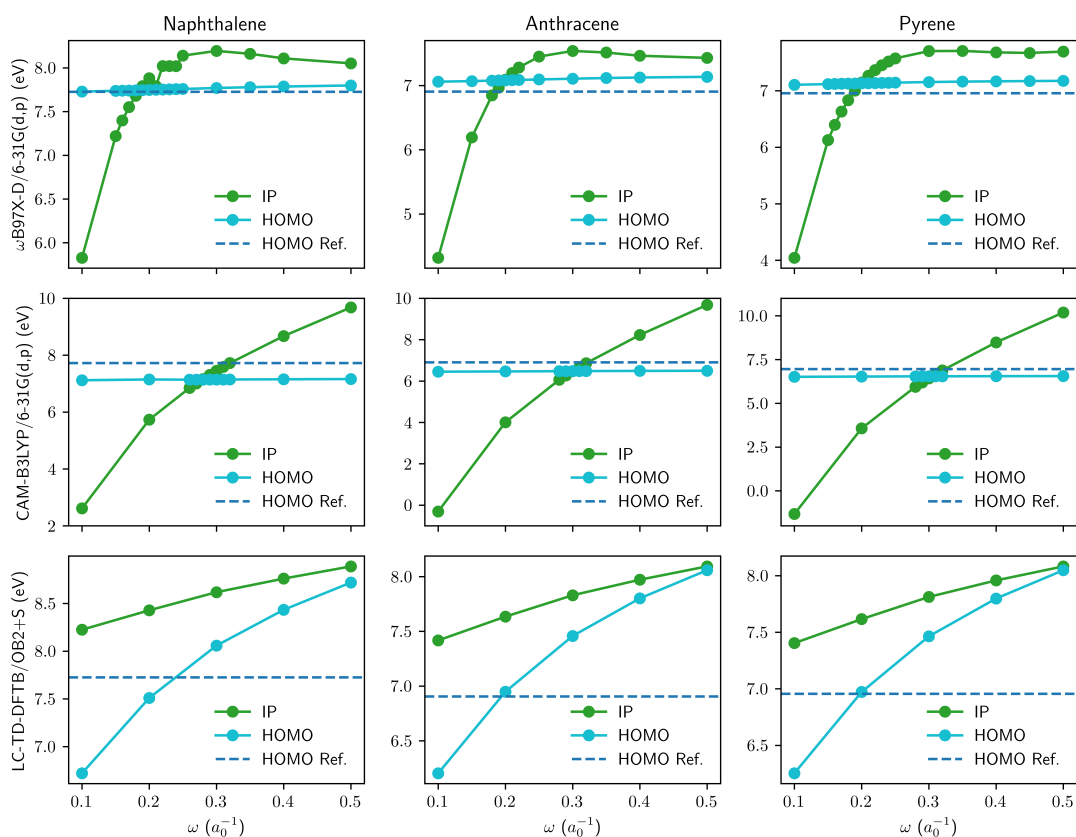

Figure S4: Ionization potential (IP) and HOMO energies as a function of long-range parameter ( $\omega$ ) for naphthalene, anthracene and pyrene at  $\omega$ B97X-D/6-31G(d,p), CAM-B3LYP/6-31G(d,p) and LC-TD-DFTB/n-OB2 levels of theory. The dashed line correspond to the reference MP3/6-31+G(d,p) HOMO energies extracted from NIST Computational Chemistry Comparison and Benchmark Database (CCCBDB).

| System                  | Method          | $\omega$ ( $a_0^{-1}$ ) | $IP$ (eV) | $EA$ (eV) | $\epsilon_{HOMO}$ (eV) | $\epsilon_{LUMO}$ (eV) |
|-------------------------|-----------------|-------------------------|-----------|-----------|------------------------|------------------------|
| DTP-IC-4Ph              | $\omega$ B97X-D | 0.1                     | -12.508   | 20.919    | -6.856                 | -1.872                 |
|                         |                 | 0.2                     | 6.417     | 2.026     | -6.880                 | -1.784                 |
|                         |                 | 0.3                     | 6.936     | 1.554     | -6.896                 | -1.717                 |
|                         |                 | 0.4                     | 3.777     | 6.883     | -6.903                 | -1.670                 |
|                         |                 | 0.5                     | 1.557     | 6.972     | -6.904                 | -1.638                 |
|                         | LC-DFTB         | 0.1                     | 5.640     | 2.732     | -5.768                 | -2.606                 |
|                         |                 | 0.2                     | 5.889     | 2.557     | -6.358                 | -2.184                 |
|                         |                 | 0.3                     | 6.100     | 2.439     | -6.764                 | -1.936                 |
|                         |                 | 0.4                     | 6.255     | 2.361     | -7.042                 | -1.783                 |
|                         |                 | 0.5                     | 6.379     | 2.289     | -7.242                 | -1.666                 |
| DTP-IC-4Ph <sup>†</sup> | $\omega$ B97X-D | 0.1                     | -9.437    | 17.939    | -6.892                 | -1.905                 |
|                         |                 | 0.2                     | 6.478     | 2.048     | -6.913                 | -1.823                 |
|                         |                 | 0.3                     | 9.518     | -0.951    | -6.927                 | -1.756                 |
|                         |                 | 0.4                     | 9.658     | -0.986    | -6.992                 | -1.714                 |
|                         |                 | 0.5                     | 9.794     | -1.197    | -6.932                 | -1.676                 |
|                         | LC-DFTB         | 0.1                     | 5.911     | 2.564     | -5.847                 | -2.656                 |
|                         |                 | 0.2                     | 6.162     | 2.268     | -6.439                 | -2.231                 |
|                         |                 | 0.3                     | 6.374     | 2.174     | -6.845                 | -1.981                 |
|                         |                 | 0.4                     | 6.530     | 2.141     | -7.124                 | -1.828                 |
|                         |                 | 0.5                     | 6.654     | 2.095     | -7.326                 | -1.712                 |

Table S2: Ionization potential (IP), electron affinity (EA), HOMO ( $\epsilon_{HOMO}$ ) and LUMO ( $\epsilon_{LUMO}$ ) orbital energies for full and alkane-free DTP-IC-4Ph. The DFTB results are presented for both optimized  $\omega$  and 6-31G(d,p) basis set was employed along with  $\omega$ B97X-D potential. The symbol <sup>†</sup> represents absence of alkane groups.

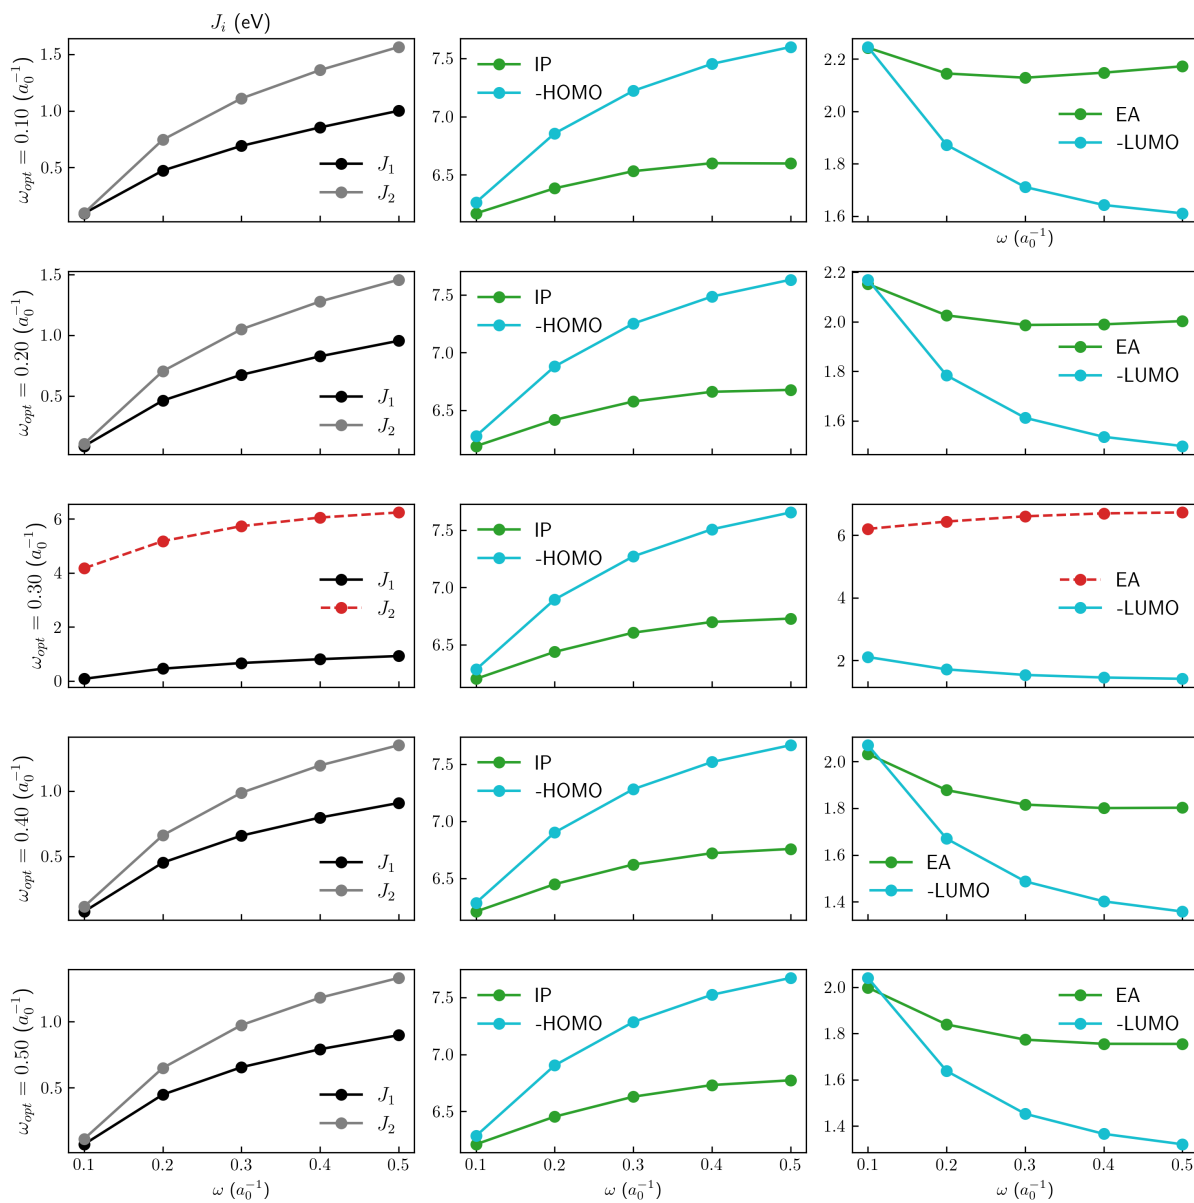

Figure S5: Interpolation of DTP-IC-4Ph vertical optimization criteria  $J_1$  and  $J_2$ ,  $IP$ ,  $EA$ ,  $\epsilon_{HOMO}$  and  $\epsilon_{LUMO}$  as a function of long-range parameter. The results were determined at the  $\omega$ B97X-D/6-31G(d,p) level of theory and each row employs the geometry optimized using a different  $\omega$ , ranging from 0.1 to 0.5  $a_0^{-1}$ .



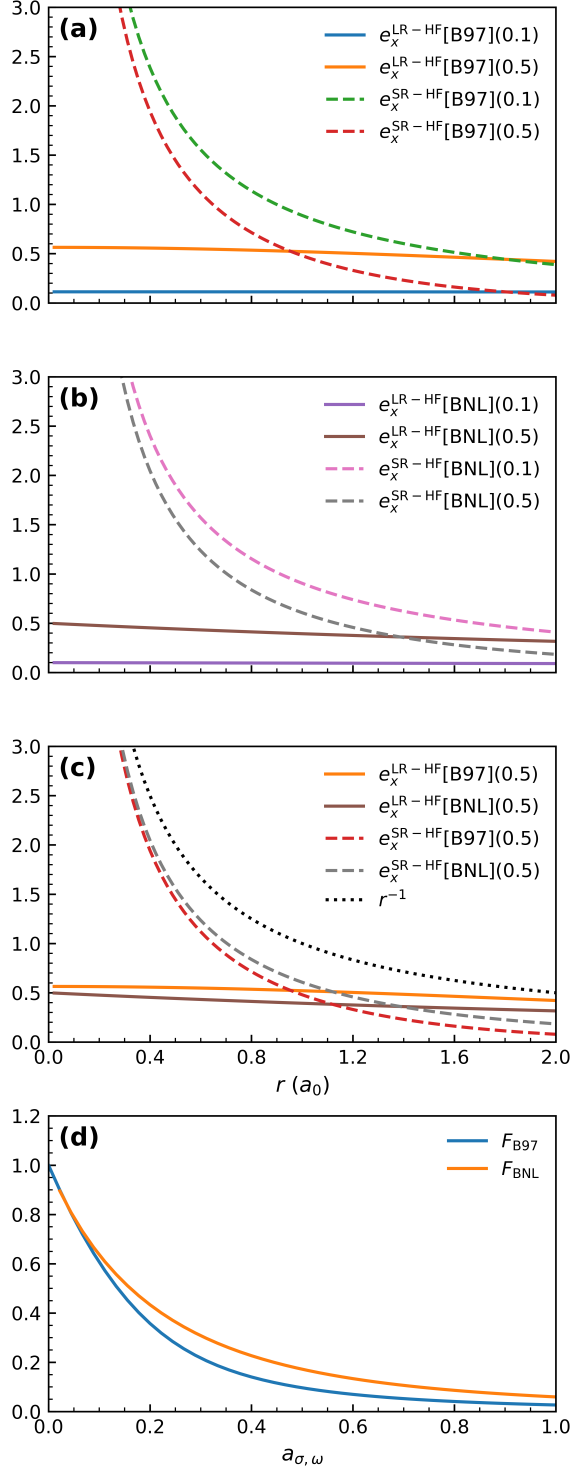

Figure S6: Kernel of short and long-range exchange contributions using (a) error functions and (b) Yukawa decompositions for  $\omega = 0.1$  and  $0.5 a_0^{-1}$ . (c) Comparison between both decompositions with  $\omega = 0.5 a_0^{-1}$ . (d) Attenuation functions for BNL and  $\omega$ B97X-D SR-DFT exchange contributions as a function of the ratio between  $\omega$  and the local Fermi wavevector ( $a_{\sigma,\omega}$ ).

## 2 Excited states

### 2.1 PAHs

Absorption spectrum of naphthalene molecule is presented for different atomic basis sets. Excitation energies and oscillator strengths of the first and brightest state of naphthalene and anthracene molecules are also presented, along with the dominant molecular orbitals involved in each transition.

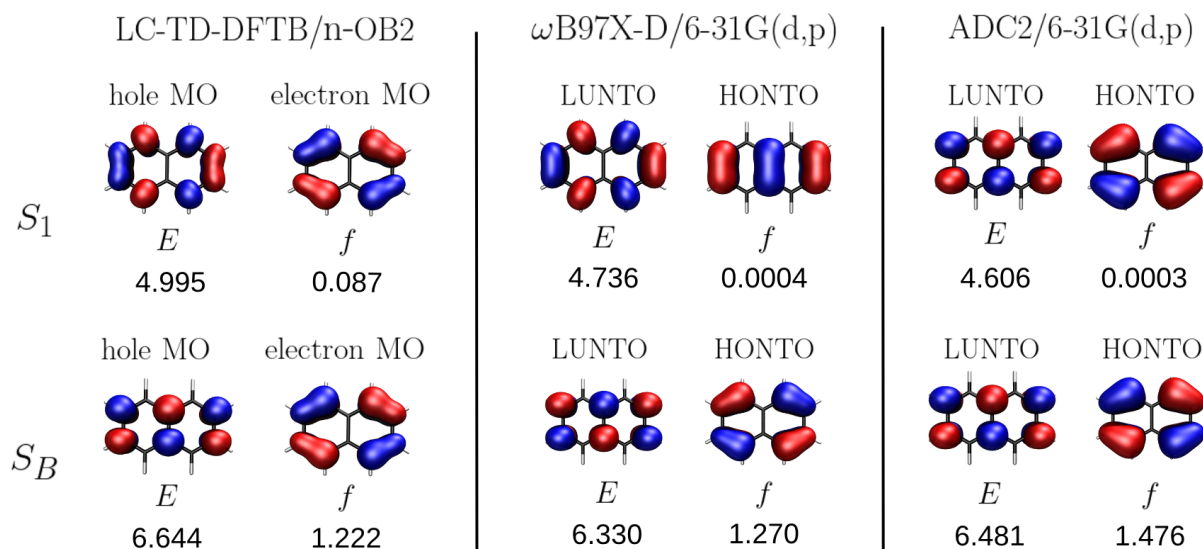

Figure S7: Excitation energies ( $E$ ) and oscillator strengths ( $f$ ) for the first ( $S_1$ ) and brightest ( $S_B$ ) excited states of naphthalene at LC-TD-DFTB/n-OB2,  $\omega$ B97X-D/6-31G(d,p) and ADC2/6-31G(d,p) levels of theory. A visual representation of each excitation is also shown in terms of Natural Transition Orbitals (NTOs) and dominant molecular orbitals (MO).

At the LC-TD-DFTB/n-OB2 level of theory, NTOs are not required due to the high coefficients ( $> 0.93$ ) associated to a single standard molecular orbital transitions. For example, HOMO  $\rightarrow$  LUMO transition has a 0.991 weight in the  $S_1$  state of naphthalene.

| System      | Method          | State | $E$ (eV) | $f$    |
|-------------|-----------------|-------|----------|--------|
| Naphthalene | LC-TD-DFTB      | $S_1$ | 4.995    | 0.087  |
|             |                 | $S_B$ | 6.644    | 1.222  |
|             | $\omega$ B97X-D | $S_1$ | 4.736    | 0.0004 |
|             |                 | $S_B$ | 6.330    | 1.270  |
|             | ADC2            | $S_1$ | 4.606    | 0.0003 |
|             |                 | $S_B$ | 6.481    | 1.476  |
| Anthracene  | LC-TD-DFTB      | $S_1$ | 3.867    | 0.108  |
|             |                 | $S_B$ | 5.953    | 1.876  |
|             | $\omega$ B97X-D | $S_1$ | 3.175    | 0.089  |
|             |                 | $S_B$ | 5.594    | 2.030  |
|             | ADC2            | $S_1$ | 3.954    | 0.108  |
|             |                 | $S_B$ | 5.666    | 2.291  |
| Pyrene      | LC-TD-DFTB      | $S_1$ | 4.131    | 0.353  |
|             |                 | $S_B$ | 5.996    | 0.883  |
|             | $\omega$ B97X-D | $S_1$ | 4.070    | 0.000  |
|             |                 | $S_B$ | 5.851    | 0.998  |
|             | ADC2            | $S_1$ | 3.902    | 0.0001 |
|             |                 | $S_B$ | 5.893    | 1.146  |

Table S3: Excitation energies ( $E$ ) and oscillator strengths ( $f$ ) of the first and brightest excited state of naphthalene, anthracene and pyrene, obtained via LC-TD-DFTB/n-OB2,  $\omega$ B97X-D/6-31G(d,p) and ADC2/6-31G(d,p) levels of theory.

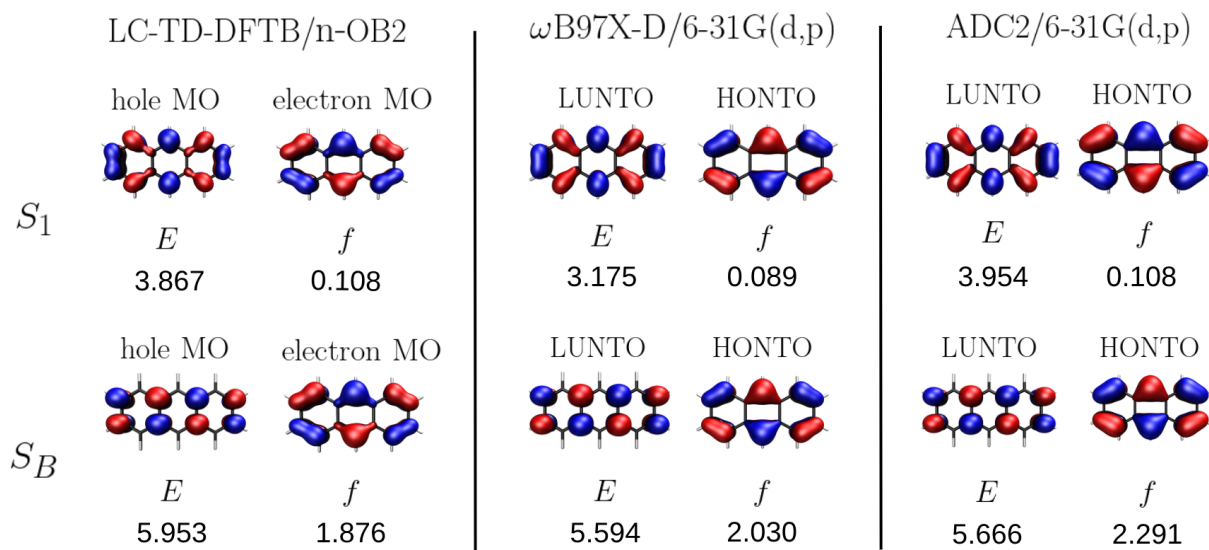

Figure S8: Excitation energies ( $E$ ) and oscillator strengths ( $f$ ) for the first ( $S_1$ ) and brightest ( $S_B$ ) excited states of anthracene at LC-TD-DFTB/n-OB2,  $\omega$ B97X-D/6-31G(d,p) and ADC2/6-31G(d,p) levels of theory. A visual representation of each excitation is also shown in terms of Natural Transition Orbitals (NTOs) and dominant molecular orbitals (MO).

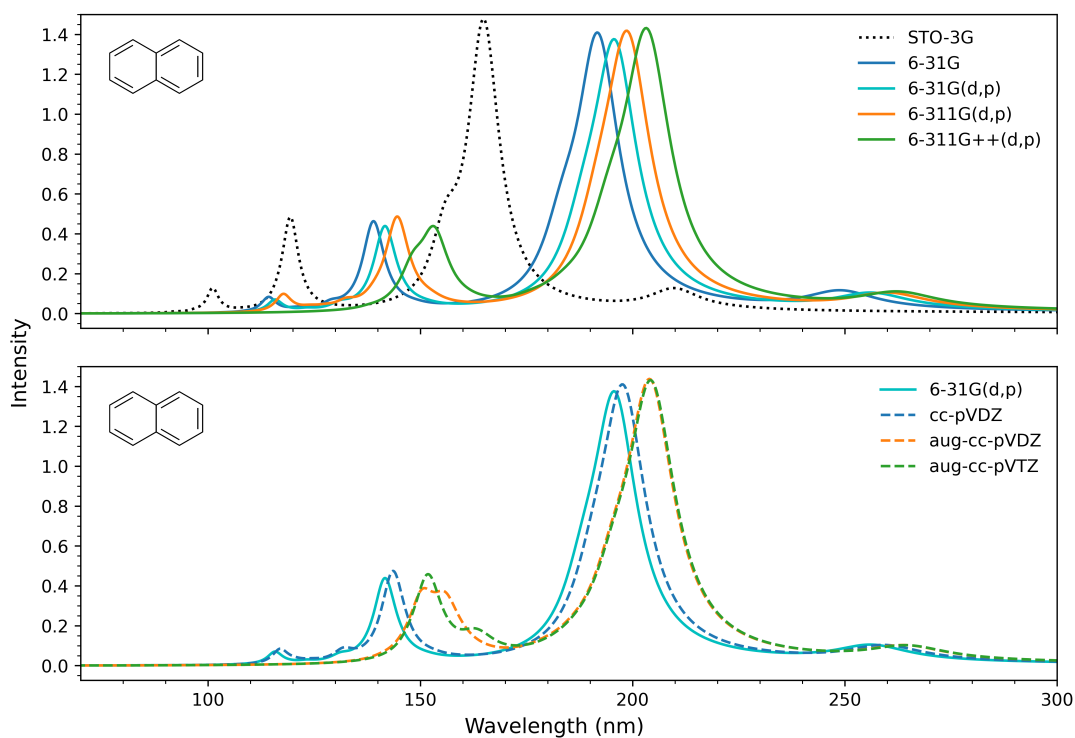

Figure S9: Naphthalene absorption spectra using using  $\omega$ B97X-D functional with Pople and correlated-consistent basis sets.

## 2.2 DTP-IC-4Ph

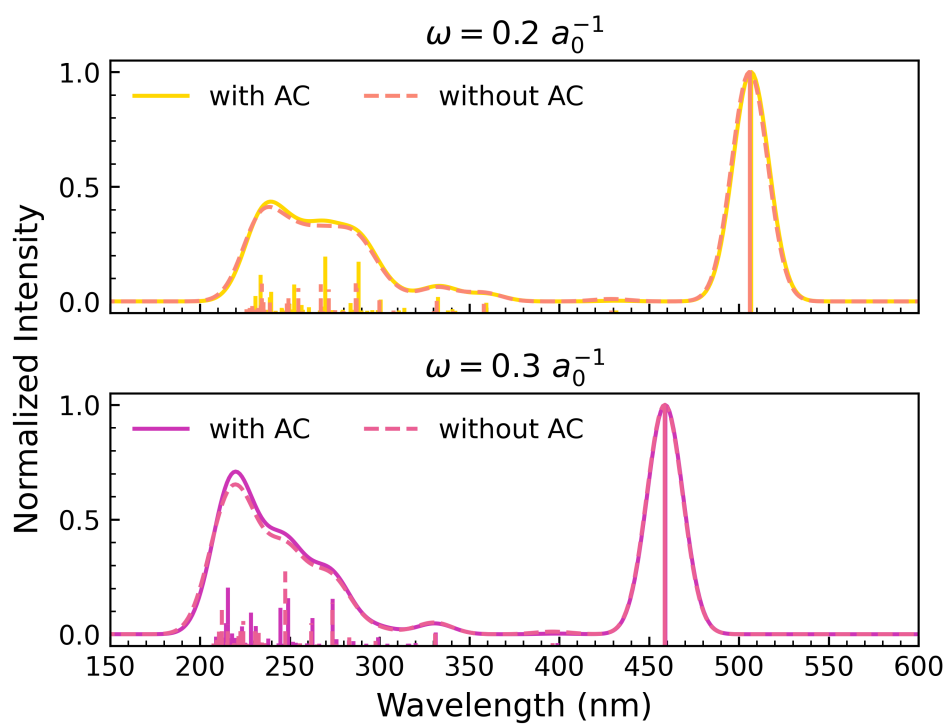

Figure S10: Normalized absorption spectra of DTP-IC-4Ph with and without alkyl chains for  $\omega = 0.2 a_0^{-1}$  (top) and  $\omega = 0.3 a_0^{-1}$  (bottom). Oscillator strengths are also plotted as vertical lines.

Excited state descriptors, population analysis and electron-hole correlation plots of DTP-IC-4Ph are presented for the  $\omega$ B97X-D/6-31G(d,p) calculations at the  $\omega$ B97X-D/6-31G(d,p) and LC-TD-DFTB/n-OB2 ground-state optimized geometries.

| System                  | State    | $\omega$ ( $a_0^{-1}$ ) | POS   | CT    | $PR_{NTO}$ | $\tilde{d}_{exc}$ ( $\text{\AA}$ ) |
|-------------------------|----------|-------------------------|-------|-------|------------|------------------------------------|
| DTP-IC-4Ph              | $S_1$    | 0.3                     | 2.062 | 0.356 | 1.697      | 5.392                              |
|                         | $S_5$    | 0.3                     | 2.954 | 0.089 | 1.013      | 2.707                              |
|                         | $S_9$    | 0.3                     | 2.042 | 0.392 | 2.412      | 7.503                              |
|                         | $S_{12}$ | 0.3                     | 2.301 | 0.285 | 3.751      | 4.516                              |
|                         | $S_{35}$ | 0.3                     | 3.358 | 0.383 | 5.812      | 6.722                              |
| DTP-IC-4Ph <sup>†</sup> | $S_1$    | 0.2                     | 2.071 | 0.382 | 1.487      | 5.993                              |
|                         | $S_5$    | 0.2                     | 2.176 | 0.433 | 2.217      | 5.513                              |
|                         | $S_9$    | 0.2                     | 1.979 | 0.450 | 2.278      | 8.021                              |
|                         | $S_{12}$ | 0.2                     | 2.016 | 0.443 | 2.566      | 7.239                              |
|                         | $S_{35}$ | 0.2                     | 2.645 | 0.736 | 3.419      | 7.179                              |

Table S4: Exciton position (POS), charge-transfer number (CT), NTO participation ratio ( $PR_{NTO}$ ) and exciton size ( $\tilde{d}_{exc}$ ) of  $S_1$ ,  $S_5$ ,  $S_9$ ,  $S_{12}$  and  $S_{35}$  excited states of DTP-IC-4Ph at  $\omega$ B97X-D level of theory. The symbol  $\dagger$  represents absence of alkane groups.

The comparison between the excited states obtained by each method is complex since the density of states is extensive, resulting in the interchange of character between states computed with each method, as discussed in the main text. As an example, we can observe  $S_{35}$  that delocalizes over the side chains at the LC-TD-DFTB/n-OB2 level and along the aromatic rings via  $\omega$ B97X-D/6-31G(d,p), reducing the CT descriptor from 0.92 to 0.38, respectively. However, considering the average behavior for the molecule with ACs, DFTB yields  $\langle CT \rangle = 0.76$  and  $\langle \tilde{d}_{exc} \rangle = 9.54 \text{ \AA}$ , in opposition to  $\langle CT \rangle = 0.41$  and  $\langle \tilde{d}_{exc} \rangle = 5.68 \text{ \AA}$  using DFT. The reduction in the DFTB optimized  $\omega$  contributes to such differences, but since localized transitions are less pronounced in the semi-empirical approach, its reasonable to expect that DFTB produces larger and more delocalized excitons in this energy range.

To assess possible geometry effects, we also performed the fragment-based analysis

using  $\omega$ B97X-D/6-31G(d,p) but at the geometry optimized with LC-TD-DFTB/n-OB2. Results are presented in Table S5, Figure S11 and Figure S12.

| System               | State    | $\omega$ ( $a_0^{-1}$ ) | POS   | CT    | $PR_{NTO}$ | $\tilde{d}_{exc}$ ( $\text{\AA}$ ) |
|----------------------|----------|-------------------------|-------|-------|------------|------------------------------------|
| DTP-IC-4Ph           | $S_1$    | 0.3                     | 2.039 | 0.347 | 1.589      | 5.583                              |
|                      | $S_5$    | 0.3                     | 2.816 | 0.101 | 1.198      | 2.895                              |
|                      | $S_9$    | 0.3                     | 2.109 | 0.414 | 2.515      | 7.713                              |
|                      | $S_{12}$ | 0.3                     | 2.076 | 0.277 | 4.123      | 4.501                              |
|                      | $S_{35}$ | 0.3                     | 3.730 | 0.284 | 5.193      | 4.831                              |
| DTP-IC-4Ph $\dagger$ | $S_1$    | 0.2                     | 2.059 | 0.378 | 1.433      | 6.093                              |
|                      | $S_5$    | 0.2                     | 2.010 | 0.397 | 2.424      | 5.403                              |
|                      | $S_9$    | 0.2                     | 1.727 | 0.413 | 2.590      | 6.575                              |
|                      | $S_{12}$ | 0.2                     | 2.064 | 0.450 | 2.508      | 7.471                              |
|                      | $S_{35}$ | 0.2                     | 2.522 | 0.607 | 3.911      | 6.828                              |

Table S5: Exciton position (POS), charge-transfer number (CT), NTO participation ratio ( $PR_{NTO}$ ) and exciton size ( $\tilde{d}_{exc}$ ) of  $S_1$ ,  $S_5$ ,  $S_9$ ,  $S_{12}$  and  $S_{35}$  excited states of DTP-IC-4Ph using  $\omega$ B97X-D at the LC-TD-DFTB/n-OB2 optimized geometry. The symbol  $\dagger$  represents absence of alkane groups.

Based on the results, the  $\pi$ -conjugated core remains rigid and planar, even though the side chains have distinct orientations. Average values are almost constant, varying the full molecule descriptors from  $\langle CT \rangle = 0.41$  and  $\langle \tilde{d}_{exc} \rangle = 5.68$  to  $\langle CT \rangle = 0.41$  and  $\langle \tilde{d}_{exc} \rangle = 5.78$  when changing to the DFTB optimized geometry. Likewise, the alkane-free system shifts the descriptors from  $\langle CT \rangle = 0.47$  and  $\langle \tilde{d}_{exc} \rangle = 6.17$  to  $\langle CT \rangle = 0.46$  and  $\langle \tilde{d}_{exc} \rangle = 6.14$ . Therefore, the excitation character is primarily dictated by the backbone structure, at least up to  $S_{40}$ . The cascade of approximations in the semi-empirical approach combined to the usage of distinct  $xc$  functionals are the responsible for the divergences, including the optimized long-range parameters that strongly impact the descriptors.

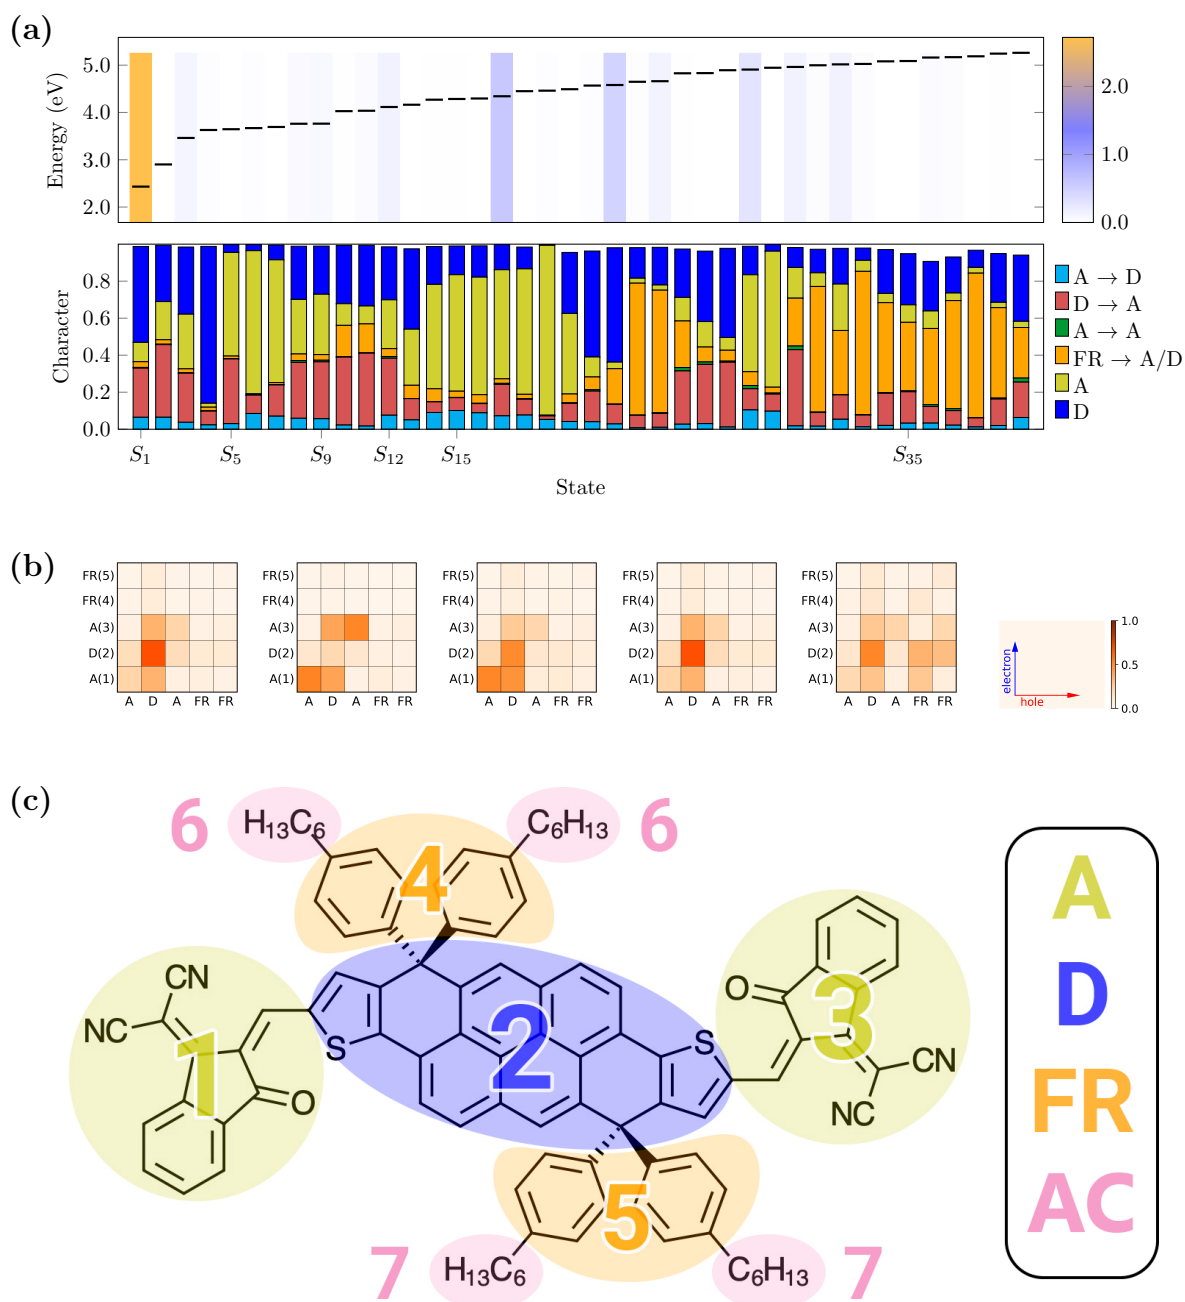

Figure S11: Fragment-based analysis of DTP-IC-4Ph without alkyl chains via  $\omega$ B97X-D/6-31G(d,p) at the geometry optimized using LC-TD-DFTB/n-OB2. (a) In the lower panel, excited states character are presented, with the corresponding excitation energies and oscillator strengths shown in the upper panel. (b) Electron-hole correlation plots of  $S_1$ ,  $S_5$ ,  $S_9$ ,  $S_{12}$  and  $S_{35}$  from left to right, respectively. (c) DTP-IC-4Ph divided into 7 fragments.



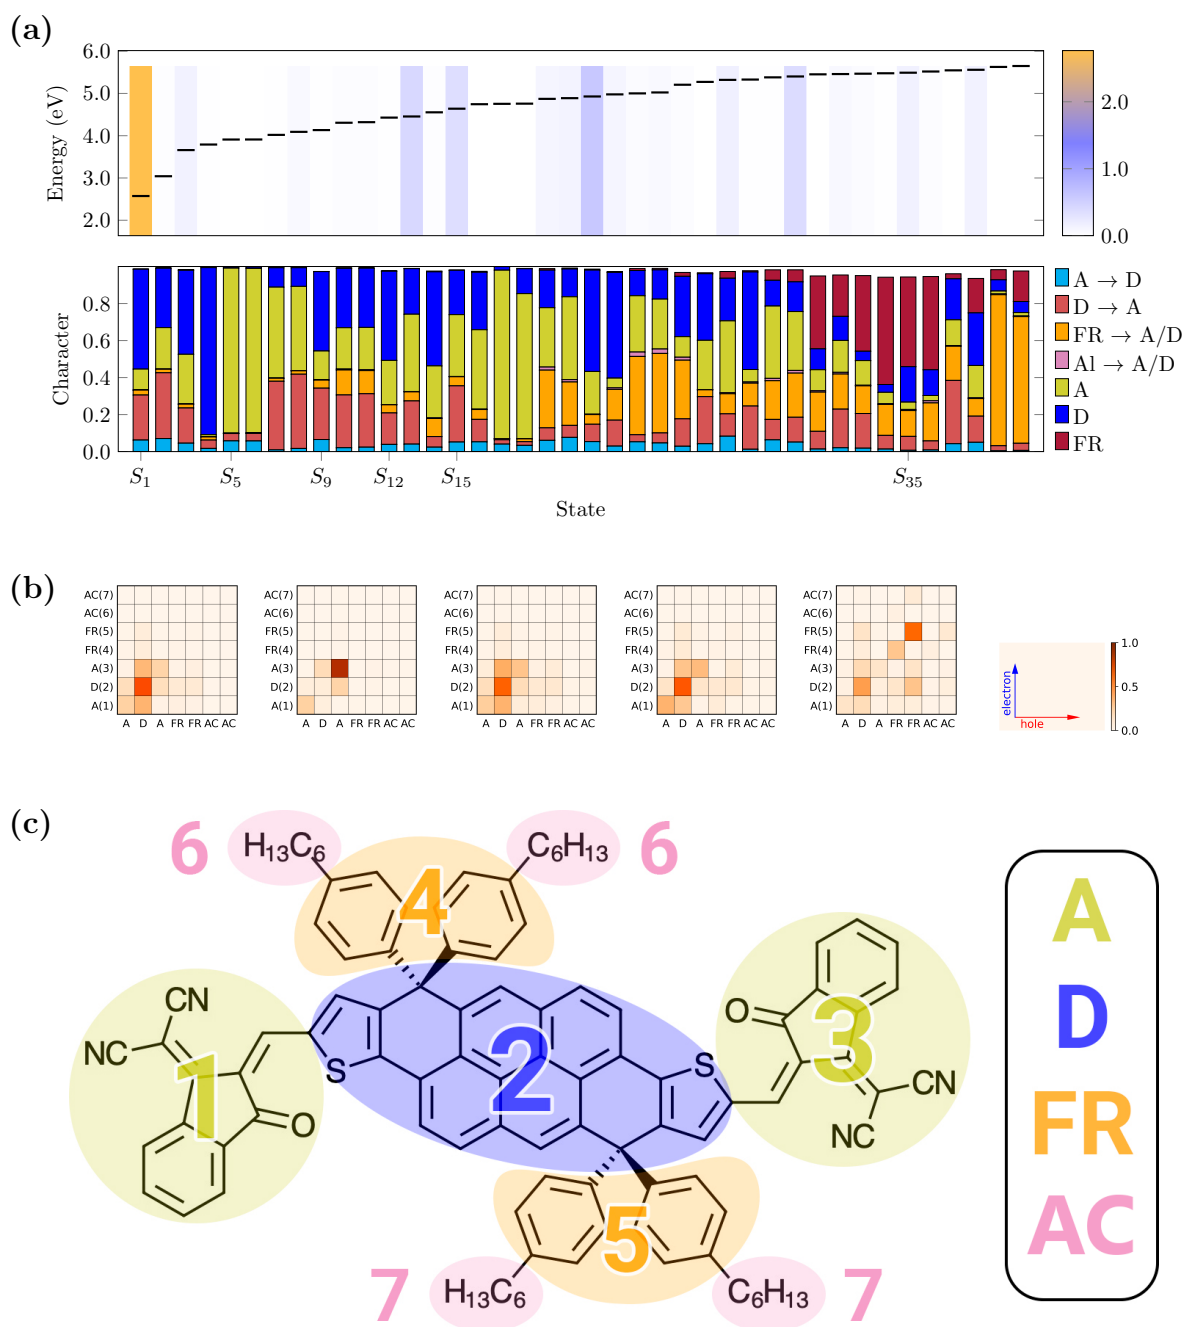

Figure S12: Fragment-based analysis of DTP-IC-4Ph via  $\omega$ B97X-D/6-31G(d,p) at the geometry optimized using LC-TD-DFTB/n-OB2. (a) In the lower panel, excited states character are presented, with the corresponding excitation energies and oscillator strengths shown in the upper panel. (b) Electron-hole correlation plots of  $S_1$ ,  $S_5$ ,  $S_9$ ,  $S_{12}$  and  $S_{35}$  from left to right, respectively. (c) DTP-IC-4Ph divided into 7 fragments.

### 3 Molecular volume estimate

For DFT calculations, the default volume estimation in Gaussian computational package [6] is given by the region of electronic density higher than 0.001 electrons/bohr<sup>3</sup>. However, such procedure is not implemented in the DFTB+ code [7], so we also determined the volume as the interior of van der Waals spheres centered in each atom, in order to calculate properties at the DFTB level of theory without relying in DFT calculations. In the latter procedure, we adopted the DFT-D3 parameterization [8] for the atomic radii and developed an algorithm employing the Monte Carlo method [9] (MC DFT-D3) to estimate the volume as the region inside the green spheres in Figure S13. This choice of atomic radii comes from the usage of this parameterization to construct cavities in the DFTB+ implicit solvent models.

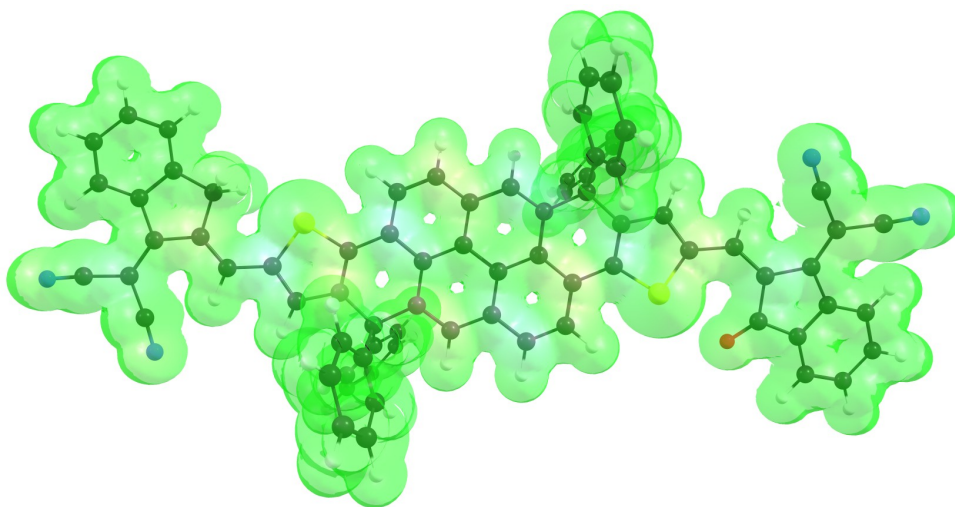

Figure S13: Schematic representation of DFT-D3 van der Waals spheres of DTP-IC-4Ph<sup>†</sup> considered to estimate the molecular volume. The symbol <sup>†</sup> represents absence of alkane groups.

To validate the model we studied six representative molecules (water, ammonia, methane, ethanol, benzene and thiophene), comparing the MC DFT-D3 approach with the region with the  $\omega$ B97X-D/6-31G(d,p) electronic density higher than 0.001 electrons/bohr<sup>3</sup>. For each molecule, the MC DFT-D3 final volume comes from the average of 10 calculations with 10<sup>6</sup> points each, showing an absolute mean error of 2.91 Å<sup>3</sup> (corresponding to 4.65% of the average). The convergence was fast and well established, as exemplified in Figure

S14 for the DTP-IC-4Ph molecule.

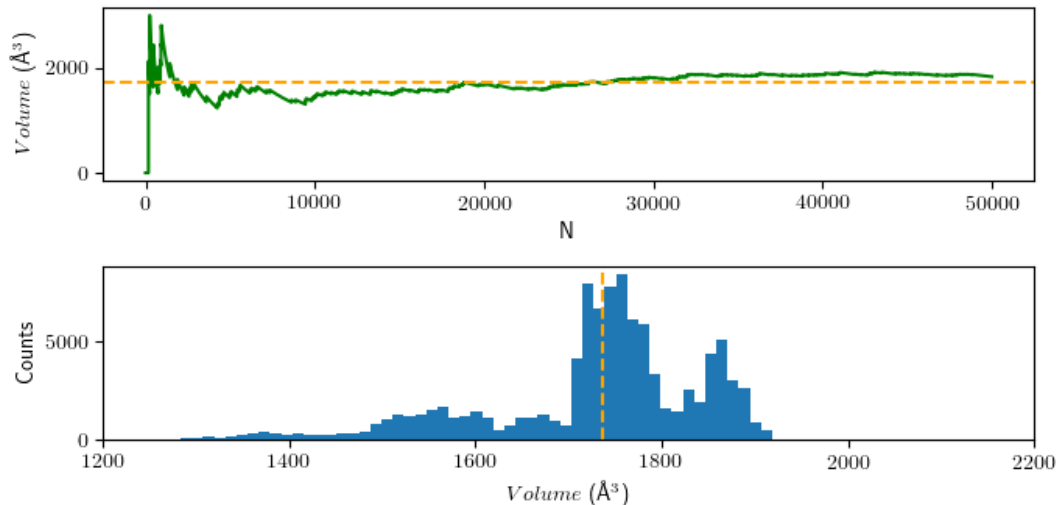

Figure S14: Evolution of DTP-IC-4Ph molecular volume. In the upper panel, the volume ( $V$ ) is shown as a function of the number of points ( $N$ ) for the first 50000 points of a single trial. The histogram in the lower panel shows the first 100000 points distribution of the same trial.

To validate the model we studied 6 small molecules with the same atoms of DTP-IC-4Ph, comparing the van der Waals approach with standard DFT calculations as presented in Table S6.

| System                                       | $\omega$ B97X-D/6-31G(d,p) | MC DFT-D3              |                                       |
|----------------------------------------------|----------------------------|------------------------|---------------------------------------|
|                                              | $V$ ( $\text{\AA}^3$ )     | $V$ ( $\text{\AA}^3$ ) | Standard deviation ( $\text{\AA}^3$ ) |
| Water ( $\text{H}_2\text{O}$ )               | 22.85                      | 25.90                  | 0.11                                  |
| Ammonia ( $\text{NH}_3$ )                    | 35.49                      | 32.03                  | 0.07                                  |
| Methane ( $\text{CH}_4$ )                    | 41.00                      | 39.25                  | 0.19                                  |
| Ethanol ( $\text{C}_2\text{H}_6\text{O}$ )   | 72.26                      | 70.62                  | 0.29                                  |
| Benzene ( $\text{C}_6\text{H}_6$ )           | 107.87                     | 107.43                 | 0.40                                  |
| Thiophene ( $\text{C}_4\text{H}_4\text{S}$ ) | 93.38                      | 100.52                 | 0.27                                  |

Table S6: Volume of representative small molecules determined using both methods. The standard deviation comes from the average of 10 calculations using  $10^6$  points in each.

## 4 Slater-Kirkwood dispersion constants

The parameters were adopted from previous work [10]. Starting with default values from DFTB+ [7] code, the parameters were optimized for thiophene, benzothiadiazole and benzotriazole in order to reproduce  $\omega$ B97X-D/6-31G(d,p) optimized geometries at the LC-DFTB/n-OB2 level of theory.

| Element | Polarizability ( $\text{\AA}$ ) |               |               |               |               |               | Cutoff ( $\text{\AA}$ ) |     |     |     |     |     | Charge ( $e$ ) |
|---------|---------------------------------|---------------|---------------|---------------|---------------|---------------|-------------------------|-----|-----|-----|-----|-----|----------------|
|         | $\alpha_{xx}$                   | $\alpha_{xy}$ | $\alpha_{yy}$ | $\alpha_{xz}$ | $\alpha_{yz}$ | $\alpha_{zz}$ | 0                       | 1   | 2   | 3   | 4   | 5+  |                |
| C       | 1.778                           | 1.442         | 1.442         | 1.433         | 1.280         | 1.280         | 3.8                     | 3.8 | 3.8 | 3.8 | 3.8 | 3.8 | 2.50           |
| H       | 0.666                           | 0.407         | 0.407         | 0.407         | 0.407         | 0.407         | 3.5                     | 3.5 | 3.5 | 3.5 | 3.5 | 3.5 | 0.80           |
| O       | 0.560                           | 0.560         | 0.560         | 0.560         | 0.560         | 0.560         | 3.8                     | 3.8 | 3.8 | 3.8 | 3.8 | 3.8 | 3.15           |
| N       | 1.096                           | 0.942         | 0.942         | 0.942         | 0.942         | 0.942         | 3.8                     | 3.8 | 3.8 | 3.8 | 3.8 | 3.8 | 2.82           |
| S       | 2.900                           | 2.700         | 2.700         | 2.700         | 2.700         | 2.700         | 4.7                     | 4.7 | 4.7 | 4.7 | 4.7 | 4.7 | 4.80           |

Table S7: Slater-Kirkwood dispersion coefficients employed in DFTB calculations. The cutoff radius is given for zero (0), one (1) and so on up to five or more (5+) first neighbours.

## References

- (1) J. Schiedt, W. Knott, K. Le Barbu, E. Schlag and R. Weinkauff, *Journal of Chemical Physics*, 2000, **113**, 9470–9478.
- (2) M. Cockett, H. Ozeki, K. Okuyama and K. Kimura, *Journal of Chemical Physics*, 1993, **98**.
- (3) J. Hager and S. Wallace, *Analytical Chemistry*, 1988, **60**.
- (4) J. Scheidt and R. Weinkauff, *Chemical Physics Letters*, 1997, **266**, 1–2.
- (5) N. Ando, S. Kokubo, M. Mitsui and A. Nakajima, *Chemical Physics Letters*, 2004, **389**, 279–283.
- (6) M. J. Frisch, G. W. Trucks, H. B. Schlegel, G. E. Scuseria, M. A. Robb, J. R. Cheeseman, G. Scalmani, V. Barone, G. A. Petersson, H. Nakatsuji, X. Li, M. Caricato, A. V. Marenich, J. Bloino, B. G. Janesko, R. Gomperts, B. Mennucci, H. P. Hratchian, J. V. Ortiz, A. F. Izmaylov, J. L. Sonnenberg, D. Williams-Young, F. Ding, F. Lipparini, F. Egidi, J. Goings, B. Peng, A. Petrone, T. Henderson, D. Ranasinghe, V. G. Zakrzewski, J. Gao, N. Rega, G. Zheng, W. Liang, M. Hada, M. Ehara, K. Toyota, R. Fukuda, J. Hasegawa, M. Ishida, T. Nakajima, Y. Honda, O. Kitao, H. Nakai, T. Vreven, K. Throssell, J. A. Montgomery, Jr., J. E. Peralta, F. Ogliaro, M. J. Bearpark, J. J. Heyd, E. N. Brothers, K. N. Kudin, V. N. Staroverov, T. A. Keith, R. Kobayashi, J. Normand, K. Raghavachari, A. P. Rendell, J. C. Burant, S. S. Iyengar, J. Tomasi, M. Cossi, J. M. Millam, M. Klene, C. Adamo, R. Cammi, J. W. Ochterski, R. L. Martin, K. Morokuma, O. Farkas, J. B. Foresman and D. J. Fox, *Gaussian 16 Revision C.01*, Gaussian Inc. Wallingford CT, 2016.
- (7) B. Hourahine, B. Aradi, V. Blum, F. Bonafé, A. Buccheri, C. Camacho, C. Cevallos, M. Y. Deshayé, T. Dumitrică, A. Dominguez, S. Ehlert, M. Elstner, T. van der Heide, J. Hermann, S. Irle, J. J. Kranz, C. Köhler, T. Kowalczyk, T. Kubař, I. S. Lee, V. Lutsker, R. J. Maurer, S. K. Min, I. Mitchell, C. Negre, T. A. Niehaus, A. M. N. Niklasson, A. J. Page, A. Pecchia, G. Penazzi, M. P. Persson, J. Řezáč,

- C. G. Sánchez, M. Sternberg, M. Stöhr, F. Stuckenberg, A. Tkatchenko, V. W.-z. Yu and T. Frauenheim, *The Journal of Chemical Physics*, 2020, **152**, 124101.
- (8) S. Grimme, J. Antony, S. Ehrlich and H. Krieg, *The Journal of Chemical Physics*, 2010, **132**.
- (9) M. H. Kalos and P. A. Whitlock, *Monte Carlo Methods*, WILEY-VCH, 2nd, 2008.
- (10) T. N. M. Varella, L. Stojanovic, V. Q. Vuong, S. Irle, T. A. Niehaus and M. Barbatti, *The Journal of Physical Chemistry C*, 2021, **125**, 5458–5474.
